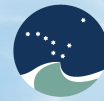

## Original Article

# Correcting density-dependent effects in abundance estimates from bottom-trawl surveys

Stan Kotwicki<sup>1,2\*</sup>, James N. Ianelli<sup>1</sup>, and André E. Punt<sup>2</sup>

<sup>1</sup>National Marine Fisheries Service, Alaska Fisheries Science Center, National Oceanic and Atmospheric Administration, 7600 Sand Point Way NE, Seattle, WA 98115, USA

<sup>2</sup>School of Fishery and Aquatic Sciences, University of Washington, Box 355020, Seattle, WA 98195, USA

\*Corresponding author: tel: +1 206 526 6614; fax: +1 206 526 6723; e-mail: [stan.kotwicki@noaa.gov](mailto:stan.kotwicki@noaa.gov)

Kotwicki, S., Ianelli, J. N., and Punt, A. E. 2014. Correcting density-dependent effects in abundance estimates from bottom-trawl surveys. – ICES Journal of Marine Science, 71: 1107 – 1116.

Received 26 August 2013; accepted 7 November 2013; advance access publication 9 January 2014.

Indices of abundance are important for estimating population trends in stock assessment and ideally should be based on fishery-independent surveys to avoid problems associated with the hyperstability of the commercial catch per unit effort (cpue) data. However, recent studies indicate that the efficiency of the survey bottom trawl (BT) for some species can be density-dependent, which could affect the reliability of survey-derived indices of abundance. A function  $q_e \sim f(u)$ , where  $q_e$  is the BT efficiency and  $u$  the catch rate, was derived using experimentally derived acoustic dead-zone correction and BT efficiency parameters obtained from combining a subset of BT catch data with synchronously collected acoustic data from walleye pollock (*Theragra chalcogramma*) in the eastern Bering Sea (EBS). We found that  $q_e$  decreased with increasing BT catches resulting in hyperstability of the index of abundance derived from BT survey. Density-dependent  $q_e$  resulted in spatially and temporarily variable bias in survey cpue and biased population age structure derived from survey data. We used the relationship  $q_e \sim f(u)$  to correct the EBS trawl survey index of abundance for density-dependence. We also obtained a variance–covariance matrix for a new index that accounted for sampling variability and the uncertainty associated with the  $q_e$ . We found that incorporating estimates of the new index of abundance changed outputs from the walleye pollock stock assessment model. Although changes were minor, we advocate incorporating estimates of density-dependent  $q_e$  into the walleye pollock stock assessment as a precautionary measure that should be undertaken to avoid negative consequences of the density-dependent  $q_e$ .

**Keywords:** acoustics, bottom-trawl survey, catchability, catching efficiency, density-dependence.

## Introduction

Indices of abundance are important for estimating population trends in stock assessment and hence fishery management. Ideally, abundance indices should be based on fishery-independent data collection methods such as design-based surveys (Maunder and Punt, 2004). Indices based on commercial fishery catch per unit effort (cpue) should be avoided, since they are unlikely to be proportional to actual abundance (Beverton and Holt, 1957; Peterman and Steer, 1981; Swain and Sinclair, 1994; Harley *et al.*, 2001; Maunder and Punt, 2004) and may fail to reflect changes in abundance due to “hyperstability” or “hyperdepletion” (Hilborn and Walters, 1992). Hyperstability represents situation when cpue stays high as abundance drops, whereas for hyperdepletion, cpue drops much faster than abundance. Stock assessments relying on such data

may fail to track population changes and could lead to fishery collapse or underutilization (Hutchings, 1996; Walters and Maguire, 1996; Erisman *et al.*, 2011). Fishery-independent bottom-trawl (BT) surveys, which are assumed to be proportional to abundance, have been widely used to provide indices of abundance to avoid problems associated with the hyperstability or hyperdepletion of the commercial cpue data (Godø, 1994; Ianelli *et al.*, 2012). However, density-dependent effects in survey BT operations may also result in hyperstable indices of abundance (Kotwicki *et al.*, 2013) similar to those observed with commercial cpue data.

Density-dependent effects of the BT have been identified as factors that may affect the reliability of abundance estimates from BT surveys (Godø *et al.*, 1990; Godø and Weststad, 1993; Godø, 1994; Aglen *et al.*, 1997; Kotwicki *et al.*, 2013). For example,

survey trawl capture efficiency for Atlantic cod (*Gadus morhua*) and haddock (*Melanogrammus aeglefinus*) increases with fish density (Godø et al., 1999). The opposite effect was observed for capelin (*Mallotus villosus*; O'Driscoll et al., 2002), Atlantic croakers (*Micropogonias undulatus*), white perch (*Morone americana*; Hoffman et al., 2009), and walleye pollock (*Theragra chalcogramma*; Kotwicki et al., 2013). Despite these findings, evaluations of the spatial and temporal variability in density-dependent BT survey efficiency are lacking, and methods which correct time-series of survey abundance indices are unavailable.

The derivation of a relative index of abundance from a fishery-independent survey is based on the relationship  $u = qD$ , where  $u$  is the catch rate (fish density) detected by the BT,  $D$  the true density, and  $q$  a proportionality constant, usually referred to as catchability (Punt and Hilborn, 1997). Catchability is often decomposed into two components  $q = q_a q_e$  (Godø, 1994), where  $q_a$  is the availability to the BT [i.e. the proportion of fish in the water column present between the bottom and effective fishing height (EFH) of the BT; hereafter, it is referred to as BT zone (BTZ)] and  $q_e$  the BT efficiency (the proportion of fish in the BTZ caught by the trawl). Catchability is unknown for most fishery-independent surveys, but it is often assumed to be stationary in time and space (Kimura and Somerton, 2006). This assumption can be critical for stock assessments, spatial dynamics studies, and ecological modelling (Kotwicki et al., 2013). Estimates of abundance trends may be misleading if either  $q_e$  or  $q_a$  of the BT is affected by density (Godø, 1994). Consequently, methods for estimating  $q_e$  and correcting survey-derived indices of abundance for density-dependence are needed.

Developing an estimator for  $q_e$  is difficult because this requires independent measures of fish density in the BTZ (Somerton et al., 1999). Past studies estimating  $q_e$  for semi-pelagic species have used independent estimates of abundance in front of the BT derived from acoustic backscatter data within the BTZ (O'Driscoll et al., 2002; Hoffman et al., 2009; Doray et al., 2010). To avoid biases, these data need to be relatively free from contamination by other species and need to have an estimate of the acoustic dead-zone correction (Ona and Mitson, 1996; Kotwicki et al., 2013). The methods are difficult to apply because most time-series of the BT survey data lack acoustic measurements. In addition, backscatter data from many survey tows are often contaminated by other organisms even if acoustic data are available. Consequently, BT efficiency is usually estimated in an experimental manner outside of standard survey operations (O'Driscoll et al., 2002) or alternatively for a subset of tows where contamination (in the backscatter) from other species can be assumed negligible (Hoffman et al., 2009). If estimates of  $q_e$  were provided for all tows within the survey time-series, a more reliable index of abundance could be available for stock assessments and ultimately fishery management.

The purpose of this investigation is to produce a more reliable BT survey index for walleye pollock (hereafter referred to as "pollock") in the eastern Bering Sea (EBS) by extending on Hoffman et al. (2009) and O'Driscoll et al. (2002) to incorporate experimentally derived acoustic dead-zone corrections and BT efficiency parameters derived from combining acoustic and BT survey data (Kotwicki et al., 2013). Our method incorporates uncertainty associated with the estimation of the acoustic dead-zone correction and BT efficiency parameters. We also obtain estimates of  $q_e$  for all tows in the survey time-series by modelling the relationship between survey cpue and  $q_e$ . We postulate that  $q_{e,i} = f(u_i)$ , where  $i$  indicates a survey tow when  $q_e$  is density-dependent. From this relationship,

we estimate  $q_{e,i}$  for all tows in a survey time-series and hence new estimates of total BT survey abundance. The secondary goal of this paper is to assess if density-dependent  $q_e$  for pollock in the EBS leads to a hyperstable index of abundance by assessing the relationship between mean survey catching efficiency and corrected index of abundance. Pollock was chosen for this investigation because it is a key species in Subarctic Pacific ecosystems and supports a substantial fishery that accounts for ~5% of global fish harvest, with annual harvests ranging from 4 to 7 million tonnes (Bailey et al., 1999). It ranked second in the world among marine species in capture production in 2008 (FAO, 2010).

## Methods

### Data

The EBS BT survey has been conducted annually over a standard grid of stations since 1982 (Lauth and Nichol, 2013). Most of the 376 survey stations were located at the centres of a  $20 \times 20$  nautical mile grid (Figure 1). Stations at the corners of the grids were also sampled in two regions (near St Matthew Island and the Pribilof Islands). The surveys are conducted annually in June and July using a standardized sampling gear (the 83–112 Eastern otter trawl). The survey stations are visited beginning with those in the northeastern corner (Bristol Bay) of the area then proceeding westward. The standard tow duration is 30 min on bottom, and the tow speed is  $1.54 \text{ m s}^{-1}$  (3 knots; see Lauth and Nichol, 2013, for details). During 2005–2009, acoustic backscatter data were collected annually for all BT hauls. A detailed description of acoustic data processing is given in Kotwicki et al. (2013).

### Abundance indices

Total population estimates from the EBS BT survey (hereafter referred to as the *status quo* index of abundance) were derived using methods detailed in Wakabayashi et al. (1985). In brief, the catch rates are calculated as  $u_i = n_i/E_i$ , where  $n_i$  is the number of pollock caught in tow  $i$  and  $E_i$  the corresponding fishing effort. Haul effort was based on area-swept estimates (Godø and Engås, 1989), defined as the product of tow distance and average net width measured with acoustic sensors (Kotwicki et al., 2011). Mean stratum catch rates (in no. hectare<sup>-1</sup>) weighted by the stratum area were combined to estimate the total abundance. Variances and coefficients of variation (CVs) around abundance estimates were calculated assuming stratified random sampling to assure consistency with the currently used methods for variance estimation in pollock EBS surveys (for details, see Wakabayashi et al. 1985).

Population-at-age estimates were derived using methods described by Wakabayashi et al. (1985) and Kimura (1989). In brief, length frequencies were weighted by cpue for each tow and combined across tows to estimate population at length. Yearly age-length keys (combined over entire survey area) were then applied to compute numbers by age and length class by strata. Finally, these data were summed over strata to estimate total survey area population at age.

### Estimating BT efficiency using acoustic data

Catch rates are corrected for density-dependence using:

$$\hat{u}_i = \frac{u_i}{q_{e,i}} \quad (1)$$

where  $\hat{u}_i$  is a BT survey catch rate for tow  $i$  corrected for density-dependence. An estimate of  $q_{e,i}$  is needed for each tow to apply Equation (1) to the  $u_i$  data. It has been shown previously that

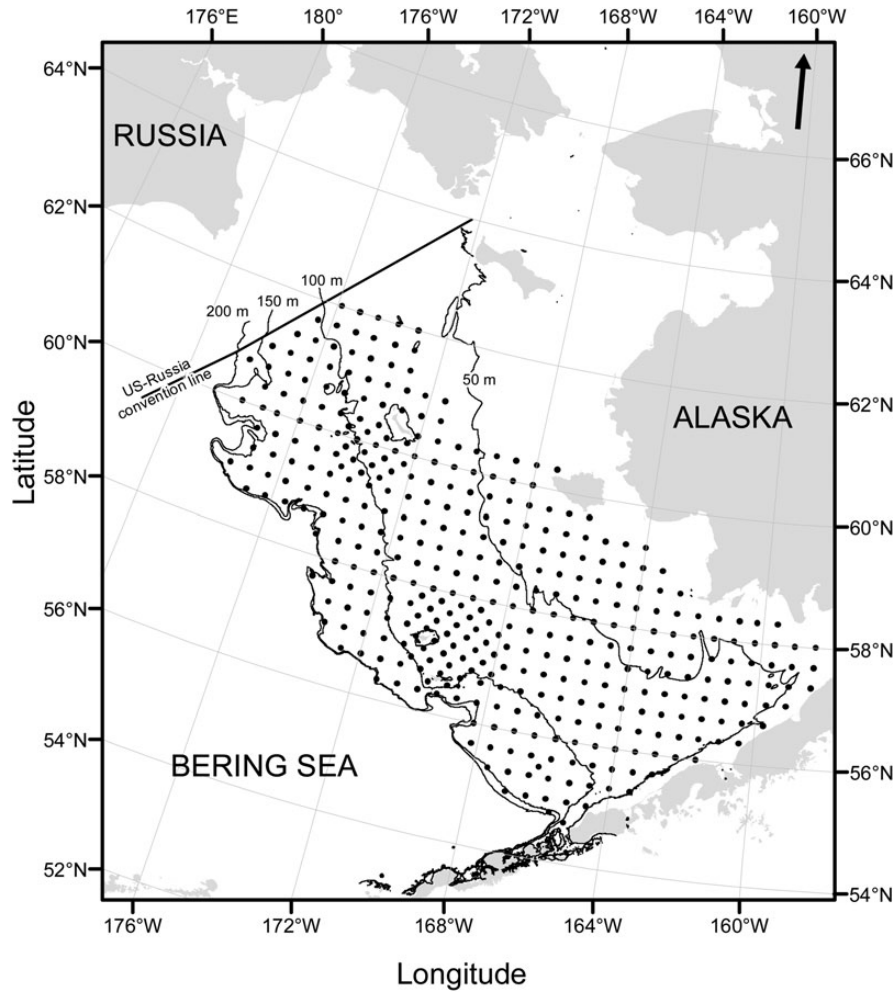

**Figure 1.** Location of the EBS bottom-trawl survey stations.

estimates of  $q_e$  can be obtained using acoustic backscatter data within the BTZ (O’Driscoll *et al.*, 2002; Hoffman *et al.*, 2009; Doray *et al.*, 2010). However, we had only 355 of ~11 000 survey tows with reliable acoustic backscatter data that could be attributed mostly to pollock (see Kotwicki *et al.*, 2013, for details). We consider the 355 tows to be representative of typical survey tows as they came from a 5-year period (2005–2009) and were spread out over the entire survey area. The function  $q_{e,i} = f(u_i)$  is needed because the only available density estimate for each BT survey tow was  $u_i$ . We, therefore, used acoustic backscatter data to estimate Bayesian posterior distributions of  $q_{e,i}$  for the 355 tows and used those to extrapolate  $q_{e,i}$  to tows without acoustic data, as explained later.

Estimates of pollock density in the BTZ were obtained from acoustic data collected during trawls coupled with a model which combines BT and acoustic data (Model D of Kotwicki *et al.*, 2013):

$$\begin{aligned}
 s_{A,BT_i} &= \left( \frac{1}{r_q(\delta_{1_i} + \delta_{2_i})} + \frac{1}{a} \right)^{-1} e^e, \\
 \delta_{1_i} &= \sum_{0.5}^{EFH} s_{A_i}, \\
 \delta_{2_i} &= e^{bX_i} \sum_{0.5}^h s_{A_i} + e^{cX_i},
 \end{aligned}
 \tag{2}$$

where  $s_{A,BT_i}$  is an equivalent of  $u_i$  in units ( $m^2$  nautical mile $^{-2}$ ; for details, see Kotwicki *et al.*, 2013) of acoustic backscatter  $s_A$ ,  $r_q$  the catchability ratio between the BT and acoustics which accounts for differences in catchability between the two methods, EFH the effective fishing height of the trawl,  $e^e$  the lognormally distributed error,  $(\delta_{1_i} + \delta_{2_i})$  the fish density in backscatter units in the BTZ, where  $\delta_{1_i}$  is the acoustic backscatter in the BTZ above the acoustic dead zone and  $\delta_{2_i}$  is the estimate of acoustic backscatter in the acoustic dead zone (hereafter referred to as the ADZ correction). The parameter  $h$  determines the height of the near-bottom acoustic layer, which is used to estimate the ADZ correction. Environmental variables that have been shown to affect pollock density in ADZ (bottom depth, surface temperature, sediment size, current speed, bottom light level; Kotwicki *et al.*, 2013) and mean fish length were included in the model as the linear covariates  $bX_i$  and  $cX_i$ , where  $b$  and  $c$  are vectors of parameters and  $X_i$  a matrix of the predictor variables. The parameter  $a$  quantified the extent of density-dependence of  $q_e$  within the BTZ.

To estimate  $q_e$ , Equation (2) needs to be transformed to the following form:

$$s_{A,BT_i} = q_{e,i} s_{A,BTZ_i},
 \tag{3}$$

where  $s_{A_i,BT_i}$  is the BT cpue expressed in units of  $s_A$ , and  $s_{A_i,BTZ_i}$  is an estimate of actual fish abundance in the BTZ. From Equation (2), we note that  $s_{A,BTZ_i} = \delta_{1_i} + \delta_{2_i}$  and after algebraic transformation,

Equation (2) becomes:

$$s_{A,BT_i} = \frac{ar_q s_{A,BT_i}}{a + r_q s_{A,BT_i}}, \quad (4)$$

so that

$$q_{e,i} = \frac{ar_q}{a + r_q s_{A,BT_i}}. \quad (5)$$

The highest posterior density estimate (HPD) of the vector  $\mathbf{q}_e$  was found by minimizing the negative log-likelihood (NLL) function:

$$\text{NLL} = 0.5N_T \log(2\pi\sigma^2) \frac{\sum_{i=1}^{N_T} (\log(s_{A,BT_i}) - \log(\widehat{s_{A,BT_i}}))^2}{2\pi\sigma^2}, \quad (6)$$

over the parameters from Equation (2) using ADMB (Fournier *et al.*, 2012).  $N_T$  is the number of tows,  $\sigma$  the error variance, and  $\widehat{s_{A,BT_i}}$  the model prediction. Markov chain Monte Carlo (MCMC) sampling was used to develop a posterior distribution of vector  $\mathbf{q}_e$ , resulting in a thinned set of 1000 vectors. Priors for all parameters for the MCMC analysis were chosen to be uniform in the plausible parameter range.

A preliminary analysis of the HPD estimates of  $\mathbf{q}_e$  suggested that the relationship between  $q_{e,i}$  and  $cpue_i$  had an exponential form because the rate of decline in  $q_e$  decreased exponentially with an increase in  $cpue$ . The following three models were fitted to the posterior means for  $q_{e,i}$ :

$$q_{e,i} = \exp(-\beta_1 s_{A,BT_i}), \quad (7a)$$

$$q_{e,i} = \exp(-(\beta_1 s_{A,BT_i} + \beta_2)), \quad (7b)$$

$$q_{e,i} = \beta_0 + \exp(-(\beta_1 s_{A,BT_i} + \beta_2)), \quad (7c)$$

where  $\boldsymbol{\beta}$  is a vector of parameters to be estimated. Model (7a) represents a function where  $q_e$  decreases exponentially with increasing fish density starting from 1 at very low densities and asymptotically declining to 0 at extremely high densities. Model (7b) includes parameter  $\beta_2$ , which allows the BT efficiency to differ from 1 at zero abundance, and model (7c) is an extension of model (7b), which allows the BT efficiency at extremely high abundance to differ from zero. The parameters of models (7a)–(7c) were estimated using the non-linear least-squares (nls) function in R (R Core Team, 2012), and the fits were evaluated using residual analysis. The fits of the three models were compared using the likelihood ratio test ( $\alpha = 0.05$ ; Hilborn and Mangel 1997). The best of models (7a)–(7c) was then fitted to each sample from the posterior of  $\mathbf{q}_e$  and used to estimate 1000 vectors of parameters ( $\boldsymbol{\beta}$ ). Each parameter vector was then used to estimate a vector of BT efficiency for each tow of the entire time-series of BT survey data ( $\mathbf{q}_{e,survey}$ ). These estimates were then used in subsequent analyses to estimate new abundance indices and spatial and temporal variability in the BT efficiency.

### New abundance estimates

The posterior draws for  $\mathbf{q}_{e,survey}$  were each used to recompute the individual tow-specific catch rates ( $u_i$ ). Each set was then used to recompute abundance estimates resulting in a set of 1000 population abundance (total and by age) estimates. There are two sources of uncertainty associated with new abundance indices: within-stratum sampling variability in  $cpue$  and the “additional variability” associated with  $q_e$ . The need to account for this additional variability in the indices of abundance has been recognized

by other researchers (Punt and Butterworth, 2003; Maunder and Punt, 2004). The variance of the new abundance estimates was estimated using a two-stage resampling process. First, a sample was drawn from the MCMC-derived  $\mathbf{q}_{e,survey}$  vectors, which was used to derive the vector of  $\hat{u}_i$  values. A stratified (by year and survey stratum) bootstrap resample was then drawn with replacement from  $\hat{u}_i$ , and the total abundance was estimated as outlined above. This procedure was repeated 1000 times. Because the abundance estimates are not independent, an among-years variance–covariance matrix ( $\sum_u$ ) was estimated using:

$$\sum_u = (y_j - \mu_y)(y_j - \mu_y)^T, \quad (8)$$

where  $y_j$  is year-specific abundance for bootstrap replicate  $j$  and  $\mu_y$  the year-specific mean abundance across all bootstrap replicates.

Since mean abundance replicates represent a corrected distribution of the survey process, the mean and variance provide an alternative index of abundance (hereafter referred to as the new index of abundance) to use within the stock assessment model (Ianelli *et al.*, 2012). To determine if the *status quo* index was hyperstable, the new index was contrasted with the *status quo* BT survey index. The hyperstable index detects changes in the population abundance that are smaller than actual changes in the population abundance (Hilborn and Walters, 1992). To determine if the *status quo* index was hyperstable, mean BT survey catching efficiency (i.e. the ratio of the *status quo* index over the new index) was plotted against the *status quo* index because the negative slope of this relationship would indicate the hyperstability of the *status quo* index.

### Estimation of the population age structure of a new index of abundance

We explored the impact of the variability in  $q_e$  among tows and the tendency of pollock to form dense schools by age class on the estimated survey proportions-at-age by year. This was done by sampling  $\hat{u}_i$  vectors, and applying the methodology described above to estimate mean  $q_e$  by age for each survey year and the means of the distributions of the proportions-at-age.

### Effect of the new BT index on stock assessment model output

The effect of replacing the *status quo* BT index of abundance with the new BT index in the stock assessment was investigated for the three BT survey data inputs: abundance, age structure, and the variance–covariance matrix. The assessment was run three times, replacing model inputs to explore the impact of each component. In the first run, we replaced only the total abundance estimates; in the second run, we replaced total abundance estimates and age structure; and in the third, we replaced all three inputs. The outputs from the runs of the assessment were compared in terms of the estimates of spawning-stock biomass (SSB) and the CVs of three estimates.

## Results

### BT efficiency

Likelihood ratio tests ( $p$ -value = 0.0031) and a lack of a trend in the residuals (Figure 2) indicated that the three-parameter model (7c) was the best of the models considered [see Table 1 for mean parameter  $\beta$  values and their s.d. for model (7c)]. The  $q_e$ , which is close to 1 for very low catches decreases exponentially with catch (Figure 3) and asymptotically approaches 0.44 at extremely large

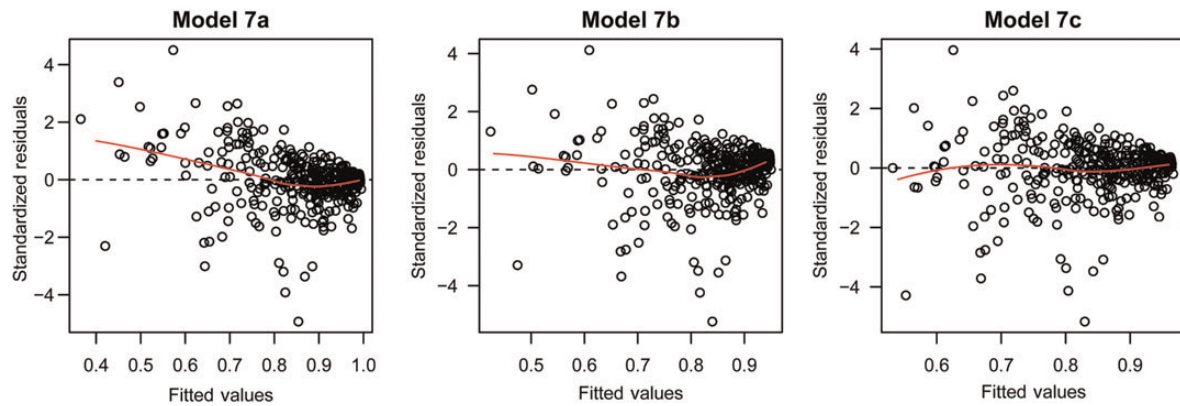

Figure 2. Standardized residuals against fitted values for models (7a), (7b), and (7c).

Table 1. Posterior mean parameter values and posterior standard deviations for parameters in model (7c).

| Parameter          | $\beta_0$ | $\beta_1$ | $\beta_2$ |
|--------------------|-----------|-----------|-----------|
| Mean               | 0.447     | 0.00046   | 0.645     |
| Standard deviation | 0.035     | 0.00014   | 0.059     |

catches. The parameter  $q_e$  varied spatially within the range of 0.50–0.98 (Figure 4) and temporally within similar range (results not shown). Examples presented on Figure 4 show that  $q_e$  in 1999 and 2012 varied spatially; however, spatial distribution of  $q_e$  was different between years, indicating temporal variability in  $q_e$  across years. Furthermore,  $q_e$  varied with pollock age and was generally lowest for ages between 3 and 8, with large interannual variability (Figure 5).

**New abundance estimates**

The new index of total abundance was consistently larger in absolute terms than the *status quo* index (Figure 6a), but the trends in relative abundance were very similar (Figure 6b). With the respect to the mean, the new index tended to be higher than the *status quo* index when the latter was high and lower when it was low, indicating evidence of hyperstability in the *status quo* index (Figure 6b). The hyperstability was confirmed by a negative trend in the relationship between mean survey efficiency and population abundance (Figure 7). Year-specific CVs for the *status quo* index and from the diagonal of the  $\sum_u$  matrix indicated that the uncertainty around the new index increased by 55% on average (Figure 6c). This increase was highly variable and ranged from 30% in 2009 to 102% in 1997.

The population age structure, represented by proportions-at-age, differed markedly between the *status quo* and new series (Figure 8). Abundance at age for ages 3–8 for the new index was generally larger, whereas the abundance at age for the other ages was generally smaller.

**Effect of the new index on stock assessment model output**

As expected, the replacement of the *status quo* index with the new index of abundance indicates that the BT index is hyperstable. However, the consequences of the extent of hyperstability appear to be small in the pollock stock assessment because the differences in SSB estimates were less than 3% (Figure 9a). The replacement of the *status quo* abundance estimates with the new index resulted in increased SSB estimates during the early part of the time-series (when abundance was highest) and decreased estimates of SSB for the years after 1990 (Figure 9a; line 1). The addition of the new

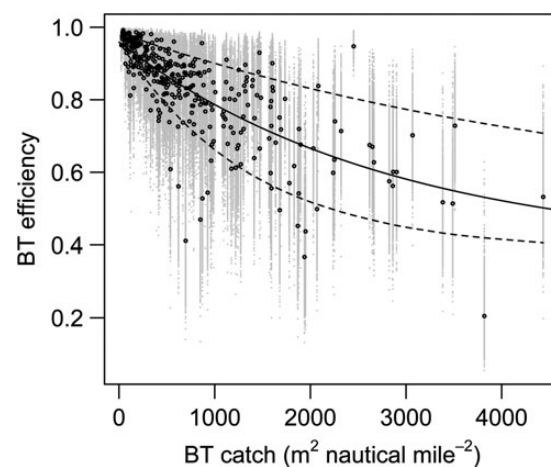

Figure 3. MCMC-derived vectors of BT efficiency vs. BT catch. Black and grey points, respectively, represent the mean and all estimates of BT efficiency ( $q_e$ ) from the MCMC samples. The black line represents the fit of model (7c) to the means, and dashed lines represent 95% confidence bounds around model predictions of  $q_e$ .

proportions-at-age had little effect on the SSB (Figure 9a; line 2). Finally, the replacement of all three new components of the index (abundance, age structure, and variance–covariance matrix) resulted in changes similar to those observed in line 1 up to year 2004, but estimates of SSB after 2004 were higher. The CV for SSB decreased for almost all years when the abundance and proportion-at-age time-series were replaced (Figure 9b; lines 1 and 2). However, the inclusion of a variance–covariance matrix led to higher CVs for both the early and most recent years and lower CVs between 1992 and 2000 (Figure 9b; line 3).

**Discussion**

Density-dependence of the BT survey catchability is a potential source of concern because it causes a systematic bias in BT cpue that could lead to bias in the assessment results and subsequent management advice. This bias increases with increasing fish density for pollock in the EBS resulting in a non-linear negative relationship between  $q_e$  and fish density. This relationship violates a major assumption that BT survey cpue is proportional to fish density and that  $q$  does not change in space or in time (Wilberg *et al.*, 2010). The consequences of this could be serious for a wide range of products derived from BT survey data because the effect

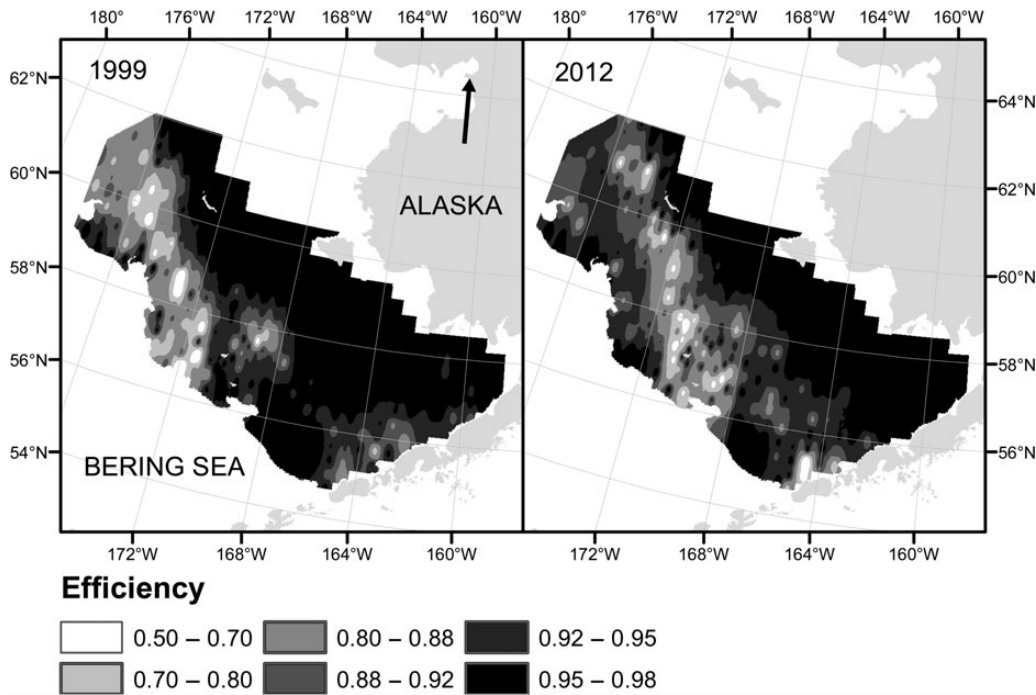

Figure 4. Examples of distribution of EBS survey BT efficiency ( $q_e$ ) from years 1999 and 2012.

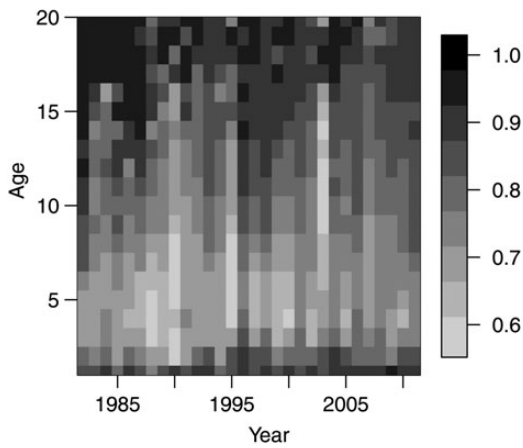

Figure 5. BT survey efficiency by year and age.

of variable  $q_e$  impacts cpue estimates at an individual station level. These include, but are not limited to, stock assessments that use abundance estimates at age and their variances (Godø et al., 1999; Ianelli et al., 2012), studies of density-dependent effects on distribution (Spencer, 2008; Kotwicki and Lauth, 2013), density-dependent mortality (Myers and Cadigan, 1993), recruitment (Myers, 2001), and ecological studies on density-dependent interactions between species (Ressler et al., 2012). Below, we will review some major implications of our findings for two types of users: those who use the BT survey data as an index of abundance over the entire survey area and those who use spatially explicit cpue data as a measure of fish density at particular sampling locations.

**Survey-wide index of abundance**

Survey-wide indices of abundance are used for management purposes in stock assessments. Our results indicate that density-dependence in  $q_e$  can impact stock assessments in three ways by

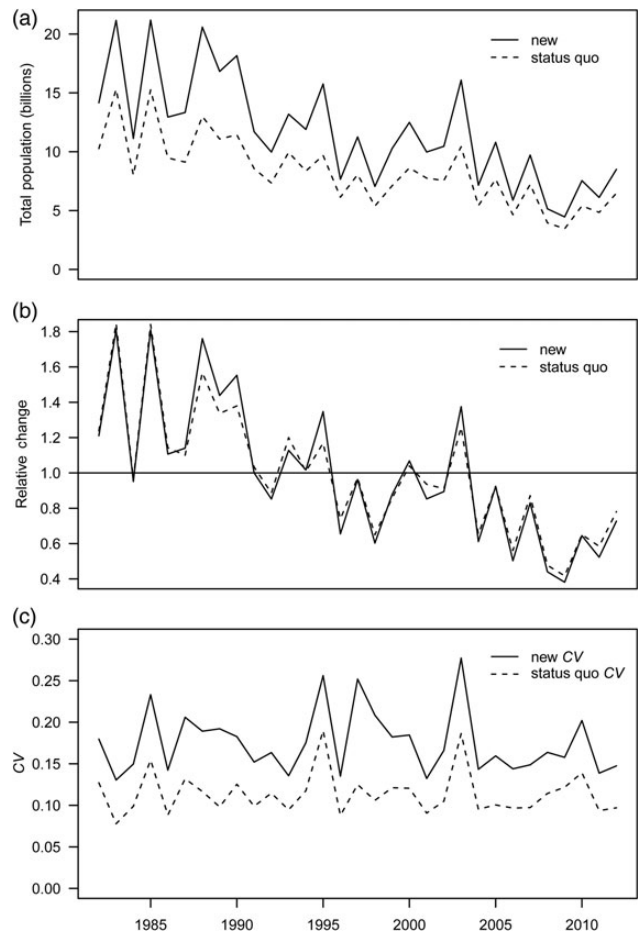

Figure 6. (a) Time-series of new vs. status quo total abundance estimates, (b) change relative to the mean abundance across the time-series, and (c) new vs. status quo CV.

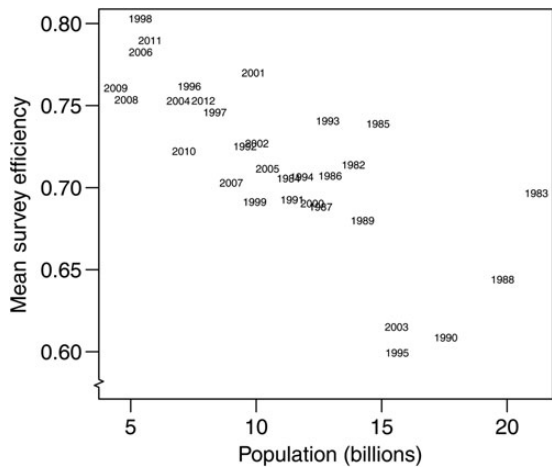

Figure 7. Mean survey efficiency vs. total abundance.

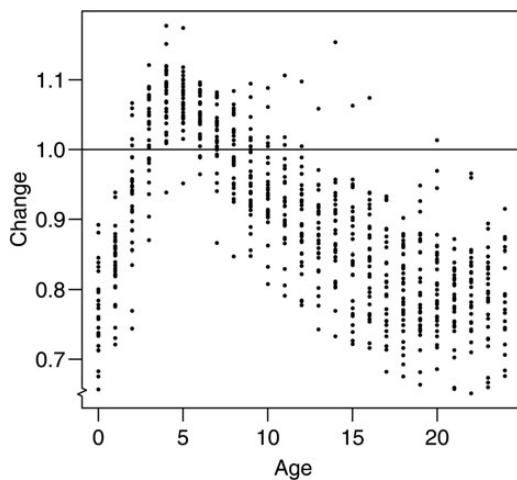

Figure 8. Relative change in the proportion of abundance at age (new divided by *status quo*) for EBS survey time-series. Each dot represents a survey year. Horizontal line represents no change.

(i) causing an index of abundance to become hyperstable, (ii) providing biased estimates of the age structure of the population, and (iii) causing (spatial and) temporal variability in survey catchability. Fishery-independent surveys have been thought not to be hyperstable (Harley *et al.*, 2001). However, our findings suggest that this assumption may not always be valid. Relative to the mean, changes in abundance between years detected by the new index were larger than those detected by the *status quo* index (Figure 6b), indicating hyperstability (Hilborn and Walters, 1992). Besides problems with detecting the correct magnitude of the change in abundance from year to year, a hyperstable BT survey-based index of abundance could also infer false trends. For example, a hyperstable index would increase if mean fish densities were the same between 2 years, but fish were more aggregated in the first year and more dispersed in the second because mean trawl efficiency would be higher during the more dispersed year. The changes in the SSB estimates that we observed in the pollock assessment suggest that the *status quo* BT index is hyperstable, although the magnitude of the effect seems to be relatively minor (<3%). Nevertheless, ignoring density-dependence of the survey BT  $q_e$  would be imprudent. Abundance indices corrected for density-dependence in the presence of a negative correlation between  $q_e$  and fish density provide a better chance

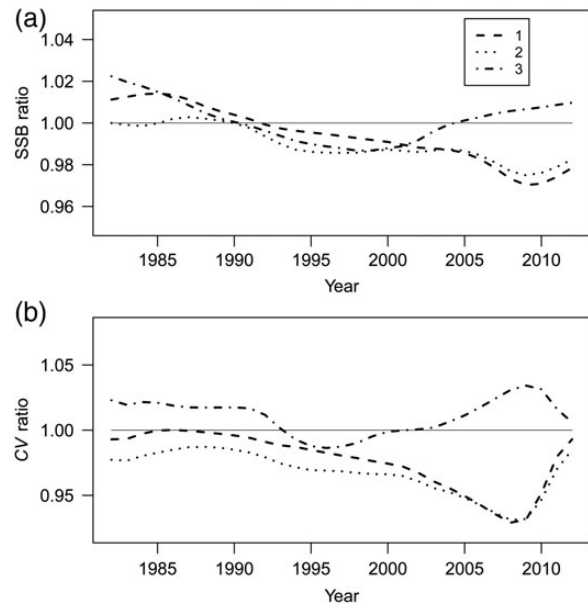

Figure 9. Ratio of SSB (upper panel) and CV of SSB (lower panel) estimated from the the stock assessment using the new index of abundance relative to that estimated from *status quo*. Line 1 represents a ratio when only abundance estimates were replaced. Line 2 represents a ratio when abundance estimates and age structure were replaced. Line 3 represents a ratio when abundance estimates, age structure, and variance structure were replaced.

for detecting changes in stock size and hence provide better advice for management.

High variability in the mean BT survey efficiency evident in Figure 7 indicates that density-dependence in  $q_e$  may lead to situations other than hyperstability. For example, the population estimate for 1983 was twice that for 1999, but mean survey efficiency for both years was similar. This was possible because of temporal variability in  $q_e$  (Figure 4). Moreover, temporal variability in survey  $q_e$  can lead to detection of false trends in population size among years. For example, corrected population estimates for 1985 and 1995 were approximately equal at 15 billion fish, but the uncorrected estimates were 11.2 and 9.5 billion fish, respectively. This temporal variability in  $q_e$  implies additional uncertainty about the index of abundance that is unaccounted for by sampling variability. Therefore, the estimates of uncertainty should include two sources: that from sampling variability and that from uncertainty associated with the estimate of survey efficiency. The increase in the CV of the new index ranged between 30 and 102%. This indicates that ignoring the contribution of uncertainty in  $q_e$  may also lead to bias in the stock assessment models, particularly the estimates of uncertainty. The need to account for the other sources of variability in the assessment models has been shown previously by Punt *et al.* (2005), where they attribute this additional variation to fluctuations in catchability and estimate it as an additional parameter in the assessment. Here, we accounted for what is likely to be the two main sources of variation, but acknowledge that other sources may exist. For example, uncertainty may also arise from the second component of  $q$ :  $q_a$ . For semi-pelagic species such as pollock,  $q_a$  depends on variability in the proportion of fish from the entire water column that are present in the BTZ, which depends on factors such as light level and fish length (Kotwicky *et al.*, 2009). Lastly, the fact that different proportions of the resource

may be present from year to year in the area surveyed can also result in an overly-optimistic impression of the precision of the survey index of abundance (Geromont and Butterworth, 2001). For pollock, this additional variability is likely since the BT survey area likely misses an unknown but variable fraction of the pollock population distribution each year (Ianelli et al., 2012).

Our results provide evidence that a density-dependent  $q_e$  can also result in biased estimates of the age structure of the index of abundance when different ages are encountered at different densities. Although  $q_e$  does not directly depend on age, but on density, large changes in the index for ages 3–8 can be attributed to the tendency of pollock of this age range to aggregate in dense schools, resulting in lower  $q_e$  according to model (7c). Younger and older pollock tend to be more spread out, so  $q_e$  is higher for these ages. This is of a concern because most stock assessments that are used for management purposes are based on age-structured population models (Punt and Hilborn, 1997). Biases in the estimates of abundance-at-age for pollock vary substantially within and across years and can be as large as 45% (Figure 5). Although we did not observe large effects on estimates of pollock SSB, biases in age structure have been shown to affect population estimates in age-structured assessments (Coggins and Quinn, 1998), recruitment, and total allowable catch (Reeves, 2003) and need to be avoided or estimated (Punt et al., 2008). It is reasonable to conclude that similar biases were present in length frequency data reported from the survey because the age-structure estimates are determined directly from length frequency data. This indicates that density-dependent  $q_e$  should be added to other causes of error in survey length frequency data, such as gear selectivity, or problems associated with subsampling of a catch (Hilborn and Walters, 1992). While discussing possible biases in population age and length structure that can be caused by density-dependent  $q_e$ , our method failed to account for the low selectivity of the gear for pollock smaller than 20 cm (1-year-old pollock) that can escape through the trawl meshes (Somerton et al., 2011). This may cause our estimates of  $u_i$  for these size classes to be biased. However, the selectivity parameters estimated within assessment (Ianelli et al., 2012) likely minimize the impact of this source of bias for management purposes. Nevertheless, the interaction between BT survey gear selectivity (and interannual variability) and abundance indices as used in assessment models should be evaluated.

The CVs about the new BT abundance index on average were over 50% larger than CVs around the *status quo* BT index because of the uncertainty associated with the estimates of  $q_e$ . Surprisingly, this increase did not cause much of the increase in uncertainty around SSB estimates from the assessment. In fact, the CV of the estimates of SSB for 8 of the 31 years was slightly lower. We attribute this result to the fact that the new index, despite the higher CVs, is actually more consistent with other data used when fitting the assessment model (i.e. the acoustic-trawl survey and fishery data).

### Spatially explicit cpue data

Survey-derived fish distribution data are extensively used in spatial dynamics studies because of their widely recognized advantages over commercial fishery data. However, little attention has been given to the reliability of the cpue data as derived from BT survey catches or other types of fish detection equipment. Generally, researchers assume that cpue data represent actual fish density or that it is proportional to fish density. This study indicates that density-dependence in  $q_e$  can cause the catching efficiency of the BT to vary spatially (Figure 4), which can lead to large errors in

estimates of spatial distribution, because estimated variability in spatial distribution may be driven by BT catching efficiency rather than actual differences in fish density. For example, Swartzman (1997) has shown that the degree of fish aggregation can be affected by environmental variables such as temperature and bottom depth. In this case, a systematic change in any environmental variable affecting fish density in aggregations could introduce a false trend in abundance time-series or spatial patterns because of the changes in density-dependent  $q_e$ . This adds to the existing evidence that spatially varying catchability can be environmentally driven (Godø et al., 1999; Kotwicki et al., 2009, 2013). This is a concern because Thorson et al. (2013) showed that relative indices of abundance will generally be biased measures of changes in population abundance in presence of spatially varying catchability.

Our findings indicate that, similar to the index of abundance, local (at station) cpue estimates are also hyperstable because detected differences between cpue at different stations (or at the same station, but at different times) are smaller than differences in actual fish density. In other words, density-dependence of  $q_e$  indicates that the BT does not capture fish in proportion to their abundance in the BTZ. Hyperstable cpue leads to the perception that spatial distribution is less variable than in reality. This is of concern especially in the studies of density-dependent effects on spatial distribution (e.g. Petitgas, 1998; Spencer, 2008; Ressler et al., 2012; Kotwicki and Lauth, 2013). Some density-dependent effects can be underestimated or even missed as higher densities can be grossly underestimated. For example, the tendency of certain ages of pollock to form dense aggregations would be underestimated in the areas where  $q_e$  is low (Figure 4). On the other hand, other effects may be overestimated. For example, if predator abundance was assessed using the BT (therefore underestimated due to density-dependent  $q_e$ ) and prey density was assessed by the acoustics, per capita prey consumption at high densities of predators may be overestimated because it would be attributed to the lesser abundance of predators. Similar errors could be expected in estimating effects of environmental variables on fish distribution when these variables affect fish density.

We have shown how BT efficiency estimates from a subset of survey tows can be incorporated into stock assessments to improve model-derived estimates of fish abundance. It, therefore, seems essential that methods be developed to incorporate survey  $q_e$  information into spatial dynamics and ecological modelling studies that use local cpue data. This is important because density-dependent processes are thought to be one of the major drivers in population dynamics (Guckenheimer et al., 1977) as well as spatial dynamics (Ciannelli et al., 2008). Without correct density information, it may be impossible to identify which processes are density-dependent and which are density-independent. Although we did not attempt to study spatial dynamics of pollock in the EBS, our estimates of  $\hat{u}_i$ , together with their posteriors (derived from the MCMC analysis), could provide a way to test the findings from previous studies of pollock distribution and predator-prey interactions (Pola, 1985; Kotwicki et al., 2005; Ressler et al., 2012; Kotwicki and Lauth, 2013). While testing the effects of our findings on previous studies would be interesting, we recommend that new studies use catch rate data that are corrected for density-dependent  $q_e$ .

The causes of the density-dependent  $q_e$  are poorly understood and warrant further investigation. Godø et al. (1999) indicated that BT  $q_e$  for Atlantic cod and haddock may be affected by schooling behaviour, which could cause fish at higher densities to be herded



more easily into path of the trawl. Johnsen and Harbitz (2013) speculated that the synchronized behaviour of sandeel (*Ammodytes marinus*) triggers a density-dependent cascading reaction among neighbouring individuals and causes increase in  $q_e$  of the survey dredge. On the other hand, Hoffman *et al.* (2009) and O'Driscoll *et al.* (2002) indicated that  $q_e$  for Atlantic croakers, white perch, and capelin may be affected by gear avoidance behaviour or trawl saturation. For EBS pollock, our results indicate that these latter effects are important. However, more research is needed to understand the causes of density-dependence in the  $q_e$  of the survey BT.

### Implications for stock assessment and studies that rely on survey data

The precautionary approach to fishery management requires that the preventive measures are taken first and, subsequently, relaxed if research demonstrates convincingly that they are not necessary (Garcia, 1994). This means that the consequences of density-dependent  $q_e$  in BT surveys should be considered for a given stock assessment. To date, only a handful of studies have undertaken either estimation of density-dependent  $q_e$  or discussed the problems that it can cause for stock assessment or other studies (Godø *et al.*, 1999; O'Driscoll *et al.*, 2002; Hoffman *et al.*, 2009). Our study shows that the biases caused by density-dependent  $q_e$  are important because they can lead to errors in stock assessment and population and spatial dynamics studies, which may lead to poor quality management advice. Although the problems with density-dependent  $q_e$  have been identified for only few species so far, evidence is lacking on the extent of the problem. Two basic approaches to investigate potential effects of density-dependent  $q_e$  can be pursued. First, as presented here, it requires an independent measure of fish density in the BTZ that can be used to estimate the relationship between fish density and  $q_e$ . A second approach could involve sensitivity analyses to explore possible effects of density-dependent  $q_e$  on stock assessment outputs and management advice. This approach will allow an evaluation of the appropriate level of precaution, given some plausibility that  $q_e$  is density-dependent.

### Disclaimer

The findings and conclusions in the paper are those of the author(s) and do not necessarily represent the views of the National Marine Fisheries Service.

### Acknowledgements

Foremost, we would like to thank everyone who participated or helped with the organization of the eastern Bering Sea bottom-trawl surveys over the last 30 years. We also thank two anonymous reviewers and John Horne, Bob Lauth, Patrick Ressler, Chris Rooper, Dave Somerton, and Mike Wiggins for reviews and discussions that greatly improved the quality of this paper. This is BEST-BSIERP Bering Sea Project publication number 118 and NPRB publication number 455.

### References

- Aglen, A., Engås, A., Godø, O. R., McCallum, B., Stansbury, D., and Walsh, S. J. 1997. Density dependent catchability in bottom trawl surveys. ICES Document CM 1997/W: 16.
- Bailey, K. M., Powers, D. M., Quattro, J. M., Villa, G., Nishimura, A., Traynor, J. J., and Walters, G. 1999. Population ecology and structural dynamics of walleye pollock (*Theragra chalcogramma*). In *Dynamics of the Bering Sea*, pp. 581–650. Ed. by T. R. Loughlin, and K. Ohtani. University of Alaska Sea Grant, AK-SG-99-03, Fairbanks, AK, USA. 838 pp.
- Beverton, R. J. H., and Holt, S. J. 1957. On the Dynamics of Exploited Fish Populations. Ministry of Agriculture, Fisheries and Food. Fishery Investigations, London, Series II, XIX. 533 pp.
- Ciannelli, L., Fauchald, P., Chan, K. S., Agostini, V. N., and Dingsør, G. E. 2008. Spatial fisheries ecology: recent progress and future prospects. *Journal of Marine Systems*, 71: 223–236.
- Coggins, L. G., and Quinn, T. J. 1998. A simulation study of the effects of ageing error and sample size on sustained yield estimates. In *Fishery Stock Assessment Models*, pp. 955–975. Ed. by F. Funk, T. J. Quinn, J. Heifetz, J. N. Ianelli, J. E. Powers, J. F. Schweigert, P. J. Sullivan, *et al.* University of Alaska, Fairbanks, Alaska Sea Grant College Program Report, AK-SG-98-01.
- Doray, M., Mahevas, S., and Trenkel, V. M. 2010. Estimating gear efficiency in a combined acoustic and trawl survey, with reference to the spatial distribution of demersal fish. *ICES Journal of Marine Science*, 67: 668–676.
- Erismann, B. E., Allen, L. G., Claisse, J. T., Pondella, D. J., Miller, E. F., and Murray, J. H. 2011. The illusion of plenty: hyperstability masks collapses in two recreational fisheries that target fish spawning aggregations. *Canadian Journal of Fisheries and Aquatic Sciences*, 68: 1705–1716.
- FAO. 2010. *The State of World Fisheries and Aquaculture 2010*. FAO, Rome. 197 pp.
- Fournier, D. A., Skaug, H. J., Ancheta, J., Ianelli, J., Magnusson, A., Maunder, M. N., Nielsen, A., *et al.* 2012. AD Model Builder: using automatic differentiation for statistical inference of highly parameterized complex nonlinear models. *Optimization Methods and Software*, 27: 233–249.
- Garcia, S. M. 1994. The precautionary principle: its implications in capture fisheries management. *Ocean and Coastal Management*, 22: 99–125.
- Geromont, H. F., and Butterworth, D. S. 2001. Possible extensions to the ADAPT VPA model applied to Western North Atlantic Bluefin Tuna, addressing in particular the need to account for “additional variance”. ICCAT Collective Volume of Scientific Papers, 52: 1663–1705.
- Godø, O. R. 1994. Factors affecting the reliability of groundfish abundance estimates from bottom trawl surveys. In *Marine Fish Behaviour in Capture and Abundance Estimation*, pp. 166–199. Ed. by A. Fernö, and S. Olsen. Fishing News Books, Oxford.
- Godø, O. R., and Engås, A. 1989. Swept area variation with depth and its influence on abundance indices of groundfish from trawl surveys. *Journal of Northwest Atlantic Fishery Science*, 9: 133–139.
- Godø, O. R., Pennington, M., and Volstad, J. H. 1990. Effect of tow duration on length composition of trawl catches. *Fisheries Research*, 9: 165–179.
- Godø, O. R., Walsh, S. J., and Engås, A. 1999. Investigating density-dependent catchability in bottom trawl surveys. *ICES Journal of Marine Science*, 56: 292–298.
- Godø, O. R., and Westpestad, V. G. 1993. Monitoring changes in abundance of gadoids with varying availability to trawl and acoustic surveys. *ICES Journal of Marine Science*, 50: 39–51.
- Guckenheimer, J., Oster, G., and Ipaktchi, A. 1977. The dynamics of density dependent population models. *Journal of Mathematical Biology*, 4: 101–147.
- Harley, S. J., Myers, R. A., and Dunn, A. 2001. Is catch-per-unit-effort proportional to abundance? *Canadian Journal of Fisheries and Aquatic Sciences*, 58: 1760–1772.
- Hilborn, R., and Mangel, M. 1997. *The Ecological Detective, Confronting Models with Data*. Princeton University Press, Princeton, NJ. 315 pp.
- Hilborn, R., and Walters, C. J. 1992. *Quantitative Fisheries Stock Assessment: Choice, Dynamics and Uncertainty*. Chapman and Hall, New York. 570 pp.
- Hoffman, J. C., Bonzek, C. F., and Latour, R. J. 2009. Estimation of bottom trawl catch efficiency for two demersal fishes, Atlantic

- croaker and white perch, in Chesapeake Bay. *Marine and Coastal Fisheries: Dynamics, Management, and Ecosystem Science*, 1: 255–269.
- Hutchings, J. A. 1996. Spatial and temporal variation in the density of northern cod and a review of hypotheses for the stock's collapse. *Canadian Journal of Fisheries and Aquatic Sciences*, 53: 943–962.
- Ianelli, J. N., Barbeaux, S., Honkalehto, T., Kotwicki, S., Aydin, K., and Williamson, N. 2012. Assessment of the walleye pollock stock in the Eastern Bering Sea. *In Stock Assessment and Fishery Evaluation Report for the Groundfish Resources of the Bering Sea/Aleutian Islands Regions*. North Pacific Fishery Management Council, Anchorage, AK, section 1: 58–157.
- Johnsen, E., and Harbitz, A. 2013. Small-scale spatial structuring of burrowed sandeels and the catching properties of the dredge. *ICES Journal of Marine Science*, 70: 379–386.
- Kimura, D. K. 1989. Variability in estimating catch-in-numbers-at-age and its impact on cohort analysis. *In Effects of Ocean Variability on Recruitment and Evaluation of Parameters used in Stock Assessment Models*, pp. 57–66. Ed. by R. J. Beamish, and G. A. McFarlane. Canadian Special Publication of Fisheries and Aquatic Sciences. 108 pp.
- Kimura, D. A., and Somerton, D. A. 2006. Review of statistical aspects of survey sampling for marine fisheries. *Reviews in Fisheries Science*, 14: 245–283.
- Kotwicki, S., Buckley, T., Honkalehto, T., and Walters, G. 2005. Variation in the distribution of walleye pollock with temperature and implications for seasonal migration. *Fishery Bulletin US*, 103: 574–587.
- Kotwicki, S., De Robertis, A., Ianelli, J. N., Punt, A. E., and Horne, J. K. 2013. Combining bottom trawl and acoustic data to model acoustic dead zone correction and bottom trawl efficiency parameters for semi-pelagic species. *Canadian Journal of Fisheries and Aquatic Sciences*, 70: 208–219.
- Kotwicki, S., De Robertis, A., von Szalay, P., and Towler, R. 2009. The effect of light intensity on the availability of walleye pollock (*Theragra chalcogramma*) to bottom trawl and acoustic surveys. *Canadian Journal of Fisheries and Aquatic Sciences*, 66: 983–994.
- Kotwicki, S., and Lauth, R. R. 2013. Detecting temporal trends and environmentally-driven changes in the spatial distribution of groundfishes and crabs on the eastern Bering Sea shelf. *Deep Sea Research II: Topical Studies in Oceanography*, 94: 231–243.
- Kotwicki, S., Martin, M. H., and Laman, E. A. 2011. Improving area swept estimates from bottom trawl surveys. *Fisheries Research*, 110: 198–206.
- Lauth, R. R., and Nichol, D. G. 2013. Results of the 2012 eastern Bering Sea continental shelf bottom trawl survey of groundfish and invertebrate resources. U.S. Department of Commerce, NOAA Technical Memorandum, NMFS-AFSC-256. 162 pp.
- Maunder, M. N., and Punt, A. E. 2004. Standardizing catch and effort data: a review of recent approaches. *Fisheries Research*, 70: 141–159.
- Myers, R. A. 2001. Stock and recruitment: generalizations about maximum reproductive rate, density dependence, and variability using meta-analytic approaches. *ICES Journal of Marine Science*, 58: 937–951.
- Myers, R. A., and Cadigan, N. G. 1993. Density-dependent juvenile mortality in marine demersal fish. *Canadian Journal of Fisheries and Aquatic Sciences*, 50: 1576–1590.
- O'Driscoll, R., Rose, G., and Andersen, J. 2002. Counting capelin: a comparison of acoustic density and trawl catchability. *ICES Journal of Marine Science*, 59: 1062–1071.
- Ona, E., and Mitson, R. B. 1996. Acoustic sampling and signal processing near the seabed: the dead zone revisited. *ICES Journal of Marine Science*, 53: 677–690.
- Peterman, R. M., and Steer, G. J. 1981. Relation between sport-fishing catchability coefficients and salmon abundance. *Transactions of the American Fisheries Society*, 110: 585–593.
- Petitgas, P. 1998. Biomass-dependent dynamics of fish spatial distributions characterized by geostatistical aggregation curves. *ICES Journal of Marine Science*, 55: 443–453.
- Pola, N. B. 1985. Numerical simulations of fish migrations in the eastern Bering Sea. *Ecological Modelling*, 29: 327–351.
- Punt, A. E., and Butterworth, D. S. 2003. Specifications and clarifications regarding the ADAPT VPA assessment/projection computations carried out during the September 2000 ICCAT West Atlantic bluefin tuna stock assessment session. *ICCAT Collective Volume of Scientific Papers*, 55: 1041–1054.
- Punt, A. E., and Hilborn, R. 1997. Fisheries stock assessment and decision analysis: the Bayesian approach. *Reviews in Fish Biology and Fisheries*, 7: 35–63.
- Punt, A. E., Pribac, F., Taylor, B. L., and Walker, T. I. 2005. Harvest strategy evaluation for school and gummy shark. *Journal of Northwest Atlantic Fishery Science*, 35: 387–406.
- Punt, A. E., Smith, D. C., KrusicGolub, K., and Robertson, S. 2008. Quantifying age-reading error for use in fisheries stock assessments, with application to species in Australia's southern and eastern scalefish and shark fishery. *Canadian Journal of Fisheries and Aquatic Sciences*, 65: 1991–2005.
- R Core Team. 2012. R: a language and environment for statistical computing. R Foundation for Statistical Computing, Vienna, Austria. ISBN 3-900051-07-0. <http://www.R-project.org/>.
- Ressler, P. H., De Robertis, A., Warren, J. D., Smith, J. N., and Kotwicki, S. 2012. Developing an acoustic survey of euphausiids to understand trophic interactions in the Bering Sea ecosystem. *Deep Sea Research II: Topical Studies in Oceanography*, 65: 184–195.
- Reeves, S. A. 2003. A simulation study of the implications of age-reading errors for stock assessment and management advice. *ICES Journal of Marine Science*, 60: 314–328.
- Somerton, D., Ianelli, J., Walsh, S., Smith, S., Godø, O., and Ramm, D. 1999. Incorporating experimentally derived estimates of survey trawl efficiency into the stock assessment process: a discussion. *ICES Journal of Marine Science*, 56: 299–302.
- Somerton, D. A., Williams, K., von Szalay, P. G., and Rose, C. S. 2011. Using acoustics to estimate the fish-length selectivity of trawl mesh. *ICES Journal of Marine Science*, 68: 1558–1565.
- Spencer, P. D. 2008. Density-independent and density-dependent factors affecting temporal changes in spatial distributions of eastern Bering Sea flatfish. *Fisheries Oceanography*, 17: 396–410.
- Swain, D. P., and Sinclair, A. F. 1994. Fish distribution and catchability: what is the appropriate measure of distribution? *Canadian Journal of Fisheries and Aquatic Sciences*, 51: 1046–1054.
- Swartzman, G. 1997. Analysis of the summer distribution of fish schools in the Pacific Eastern Boundary Current. *ICES Journal of Marine Science*, 54: 105–116.
- Thorson, J. T., Clarke, M. E., Stewart, I., and Punt, A. E. 2013. The implications of spatially varying catchability on bottom trawl surveys of fish abundance, and a proposed solution involving underwater vehicles. *Canadian Journal of Fisheries and Aquatic Sciences*, 70: 294–306.
- Wakabayashi, K., Bakkala, R. G., and Alton, M. S. 1985. Methods of the US–Japan demersal trawl surveys. *International North Pacific Fisheries Commission Bulletin*, 44: 7–29.
- Walters, C., and Maguire, J.-J. 1996. Lessons for stock assessment from the northern cod collapse. *Reviews in Fish Biology and Fisheries*, 6: 125–137.
- Wilberg, M. J., Thorson, J. T., Linton, B. C., and Berkson, J. 2010. Incorporating time-varying catchability into population dynamic stock assessment models. *Reviews in Fisheries Science*, 18: 7–24.
